# Supplementary material for: Genome-Wide Association Study of Liver Enzymes in Korean Children
Source: PubMed Central journal article supplement — Genomics Inform. 2013 Sep 30;11(3):149–54. doi: 10.5808/GI.2013.11.3.149 (PMC3794088; doi:10.5808/gi.2013.11.3.149), 2013-09-30
Supplement: gni-11-149-s001.pdf [file gni-11-149-s001.pdf]

## SUPPLEMENTARY INFORMATION

### Genome-Wide Association Study of Liver Enzymes in Korean Children

**Tae-Joon Park<sup>1</sup>, Joo-Yeon Hwang<sup>1</sup>, Min Jin Go<sup>1</sup>, Hye-Ja Lee<sup>2</sup>, Han Byul Jang<sup>2</sup>,  
Youngshim Choi<sup>2</sup>, Jae Heon Kang<sup>3</sup>, Kyung Hee Park<sup>4</sup>, Min-Gyu Choi<sup>5</sup>, Jihyun Song<sup>2</sup>,  
Bong-Jo Kim<sup>1\*</sup>, Jong-Young Lee<sup>6\*\*</sup>**

<sup>1</sup>Division of Structural and Functional Genomics, Center for Genome Science, Korea National Institute of Health, Cheongwon 363-951, Korea, <sup>2</sup>Division of Metabolic Diseases, Center for Biomedical Sciences, Korea National Institute of Health, Cheongwon 363-951, Korea, <sup>3</sup>Department of Family Medicine, Obesity Research Institute, Inje University Seoul Paik Hospital, Inje University College of Medicine, Seoul 100-032, Korea, <sup>4</sup>Department of Family Medicine, Hallym University Sacred Heart Hospital, Hallym University College of Medicine, Anyang 431-796, Korea, <sup>5</sup>Department of Family Medicine, Hallym University Kangnam Sacred Heart Hospital, Hallym University College of Medicine, Seoul 150-950, Korea, <sup>6</sup>Ministry of Health and Welfare, Seoul 110-793, Korea

## Supplementary figure legends

**Supplementary Fig. 1.** Genotype clusters of single nucleotide polymorphisms (SNPs) associated with alanine transaminase (ALT) and/or aspartate transaminase (AST) levels. Cluster images of each SNP with the lowest p-values ( $p < 1.0 \times 10^{-5}$ ) of association with ALT and AST levels. Genotype clustering was performed using GenomeStudio software (Illumina, San Diego, CA, USA).

rs4949718

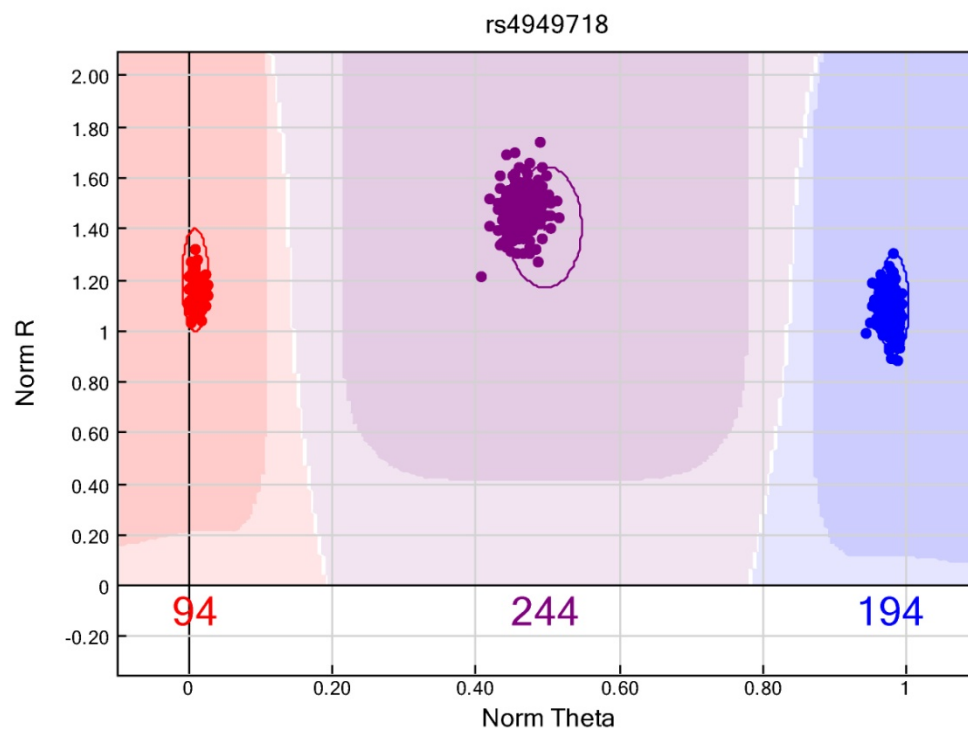

rs17801127

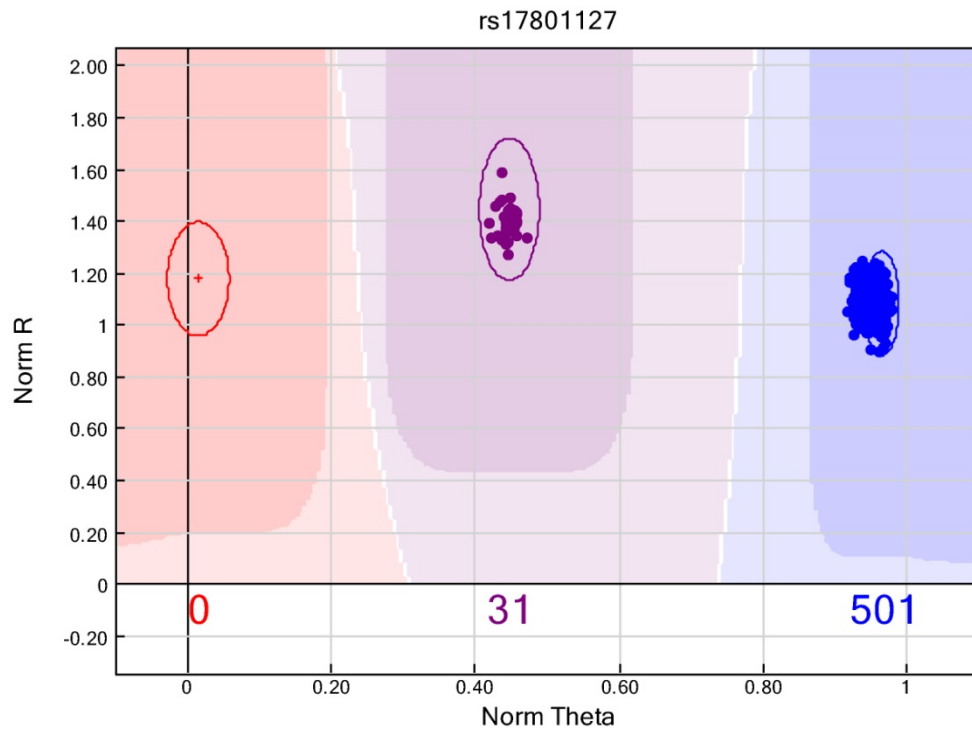

rs1539893

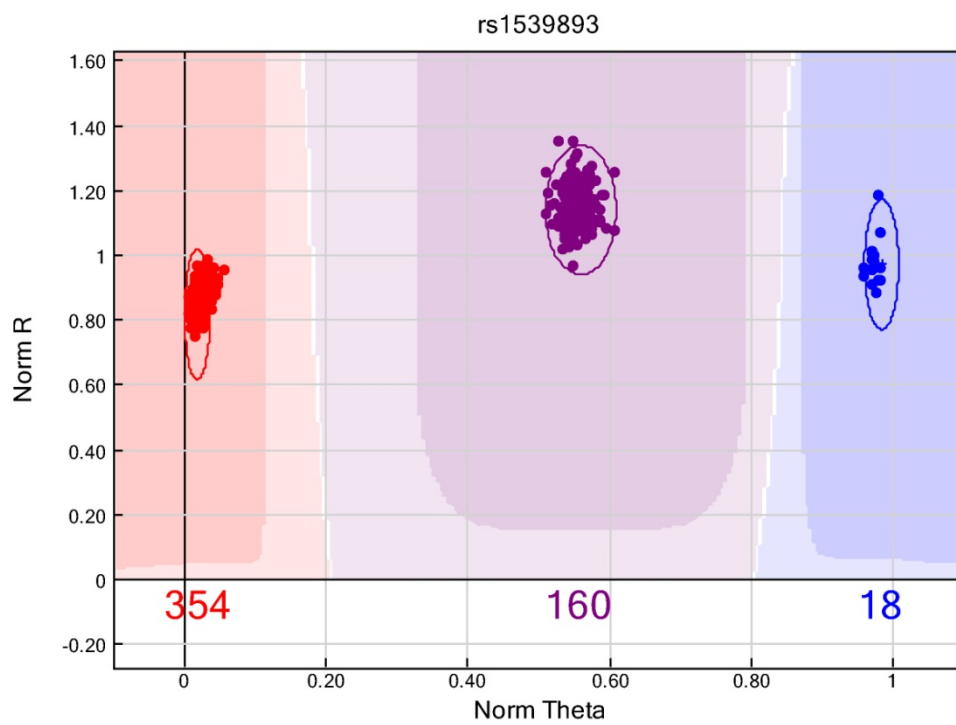

rs12035879

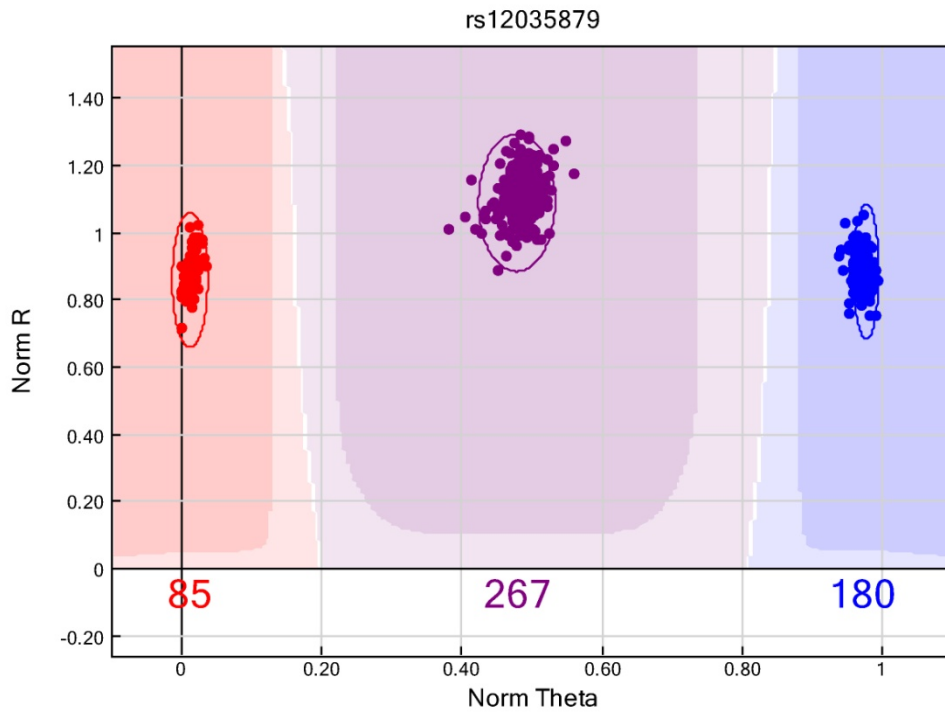

rs9941219

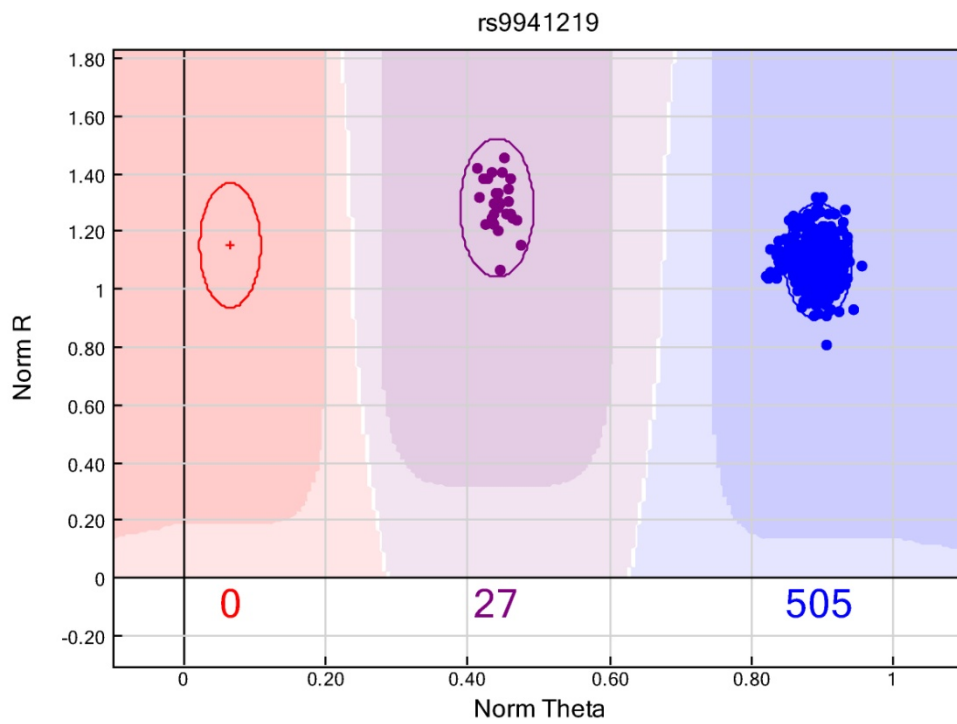

rs731660

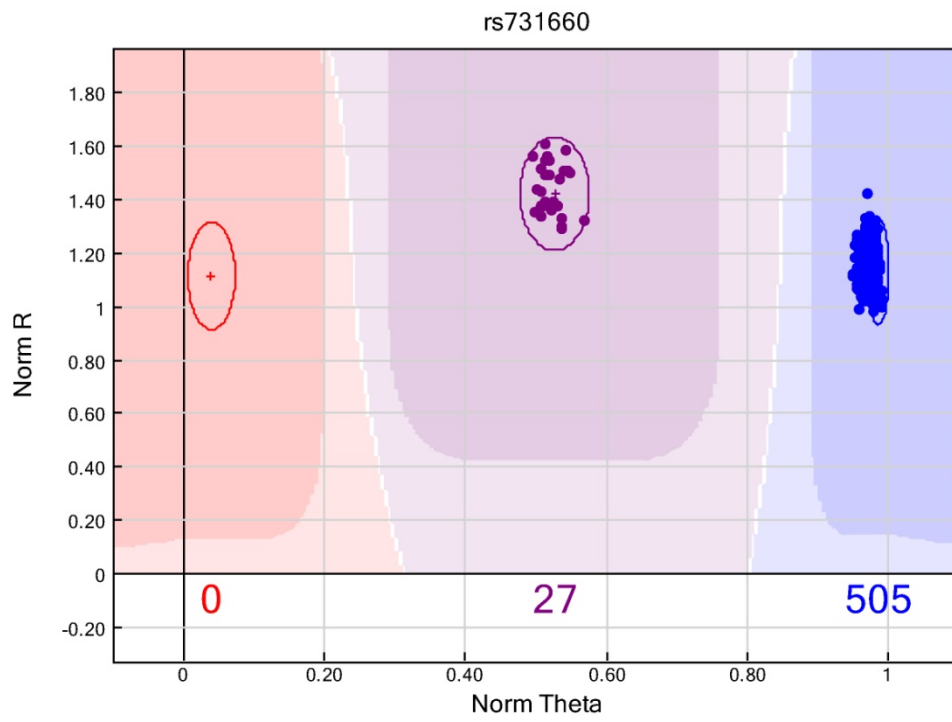

rs12621256

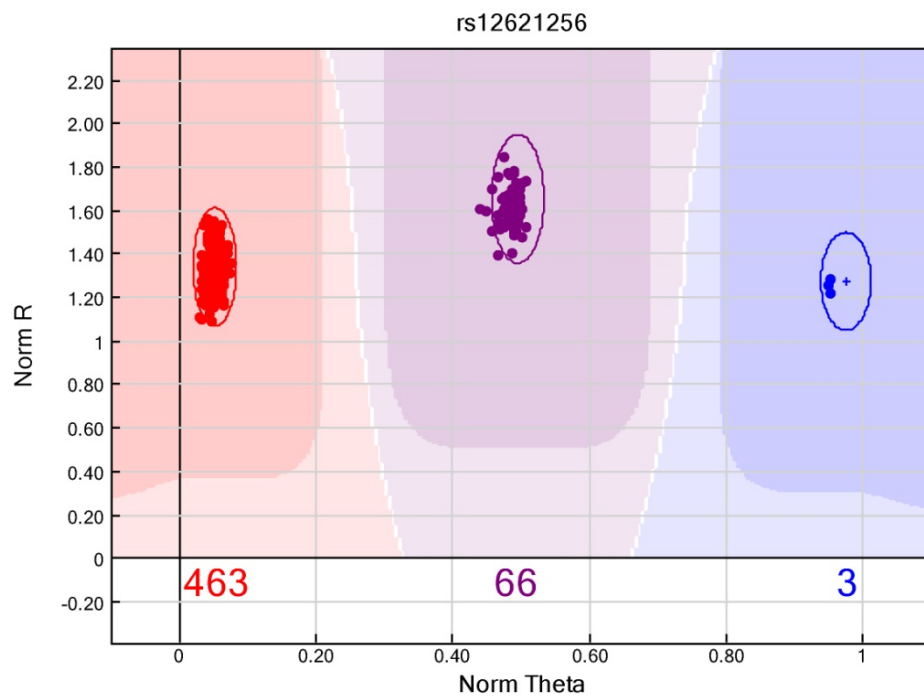

rs6035126

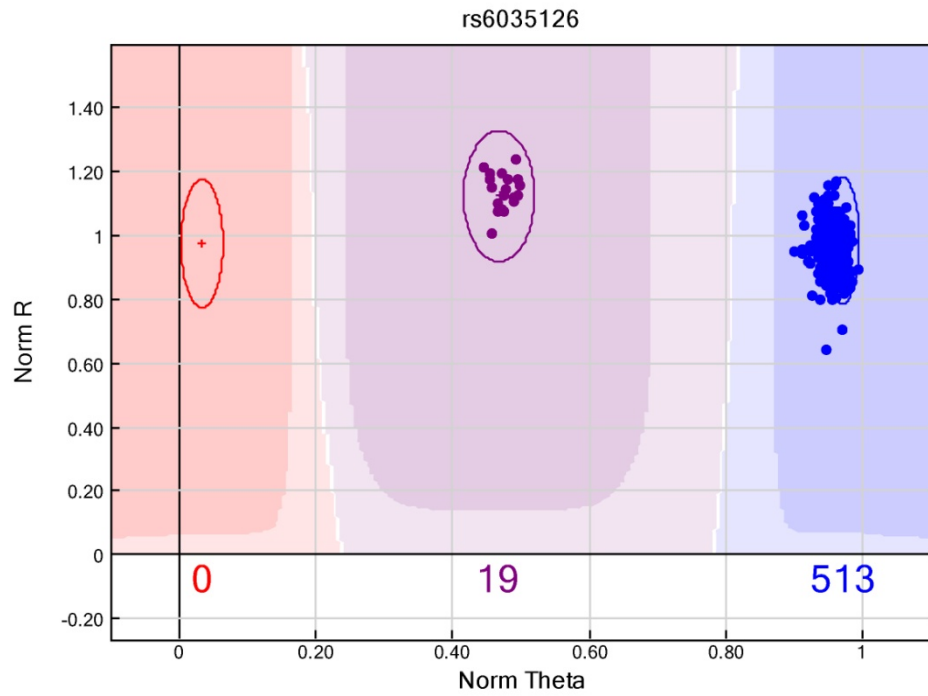

rs13433286

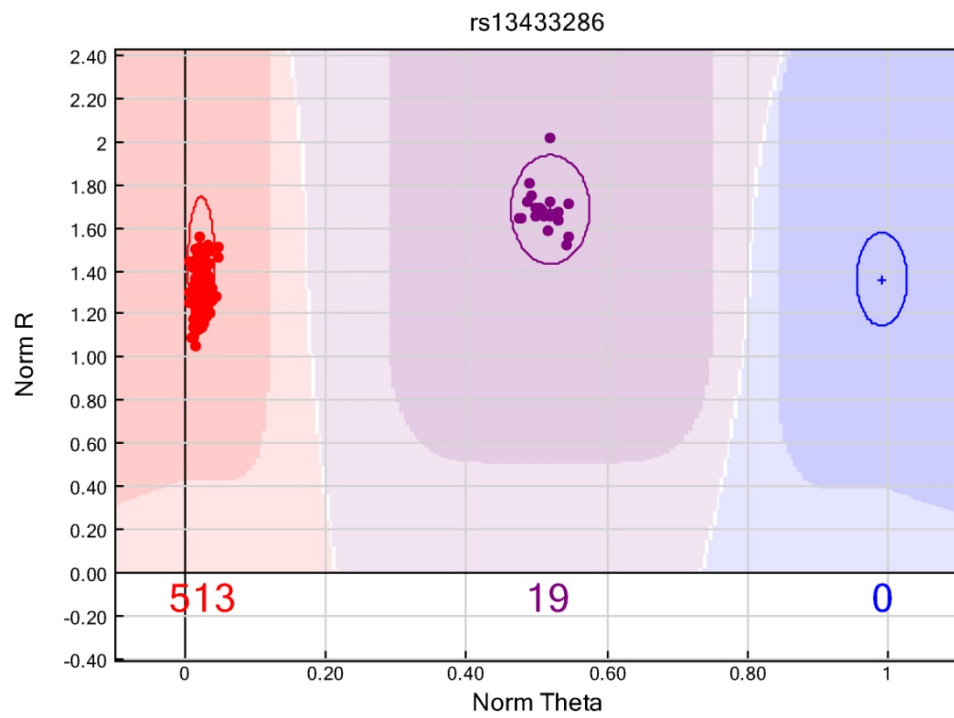

rs844917

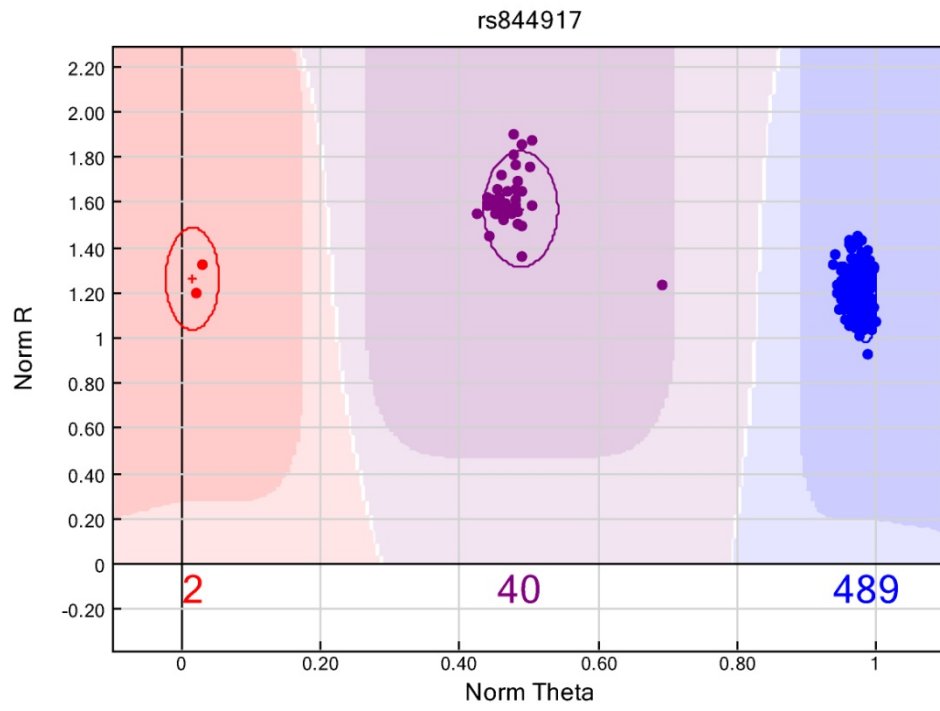

rs844914

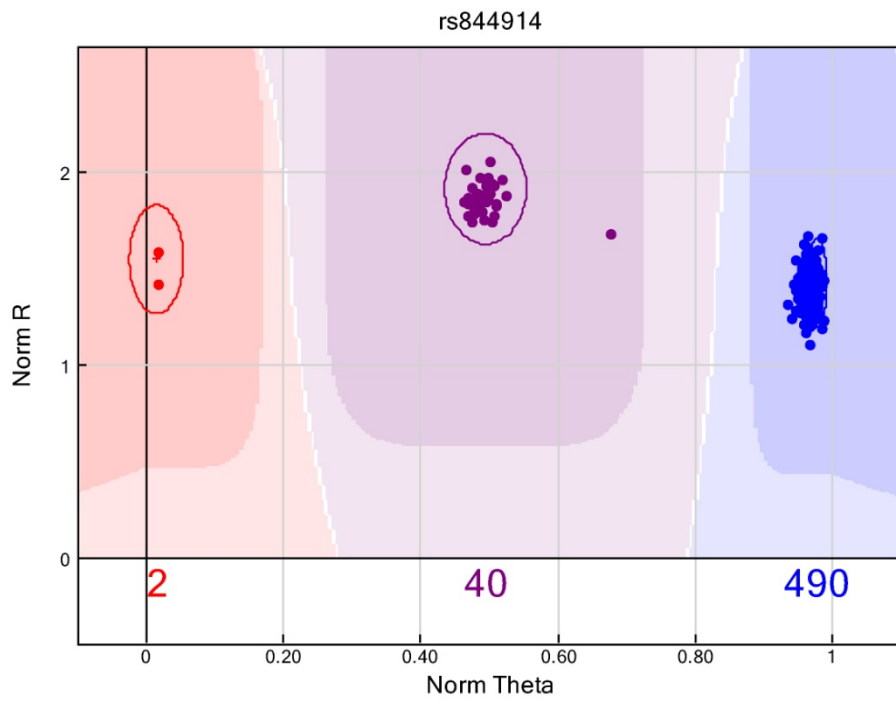

rs903107

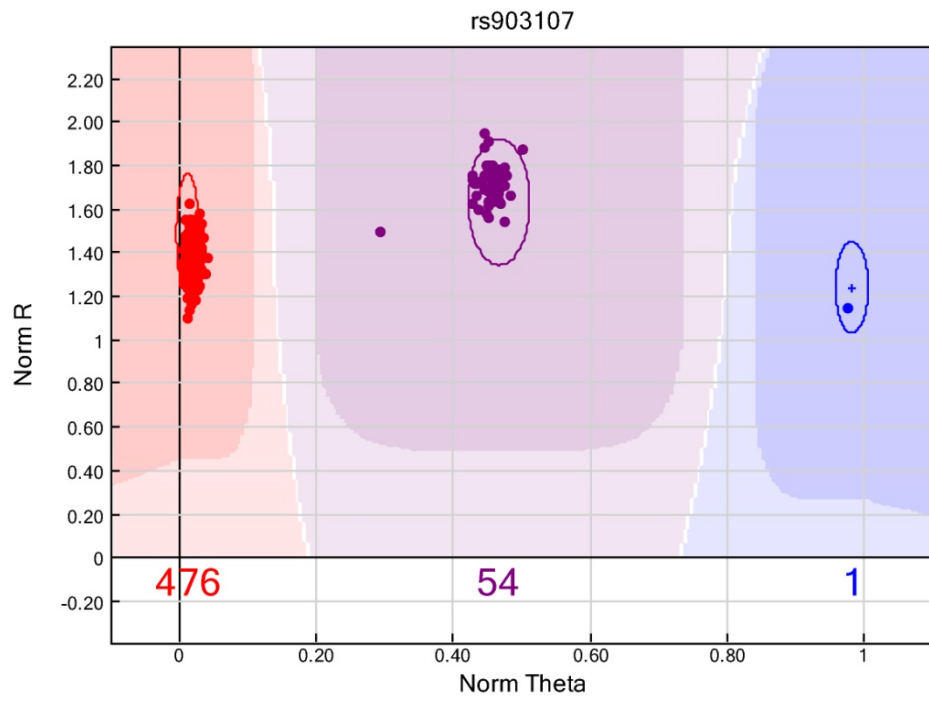

rs80311637

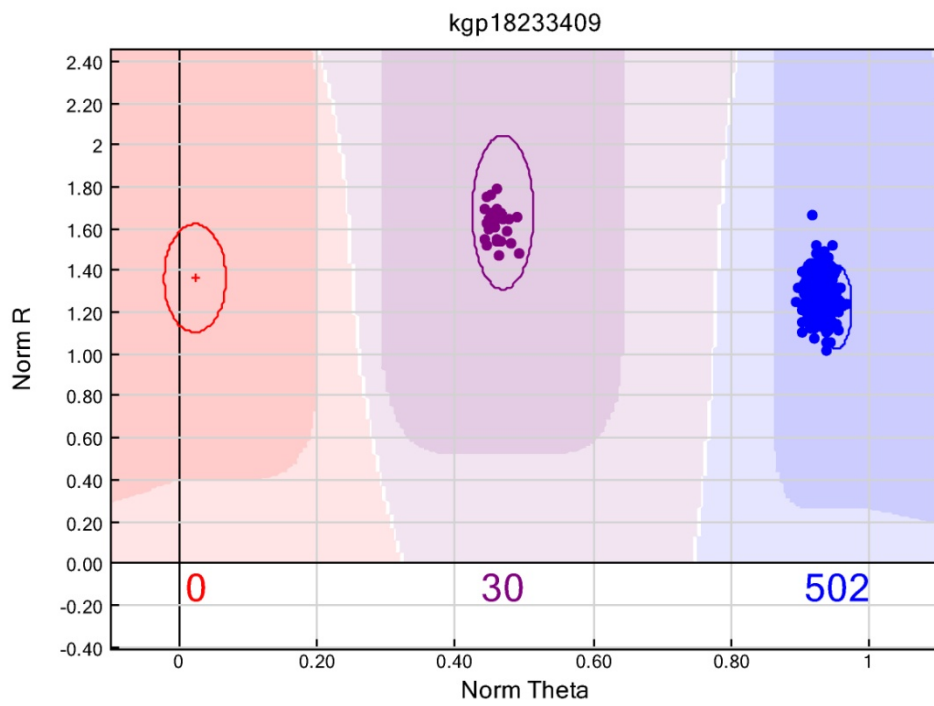



rs596406

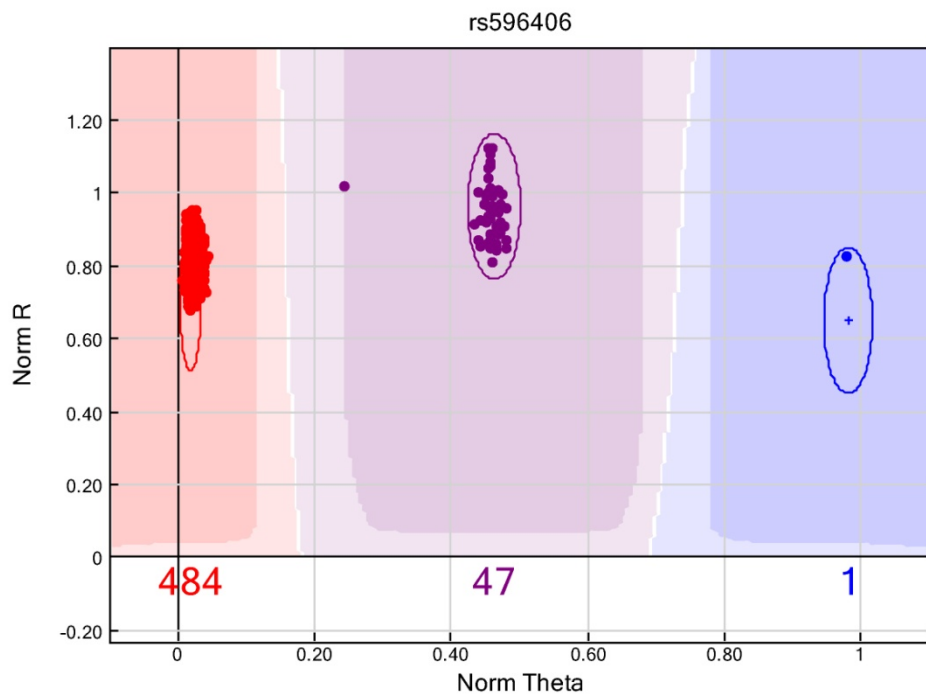

rs862946

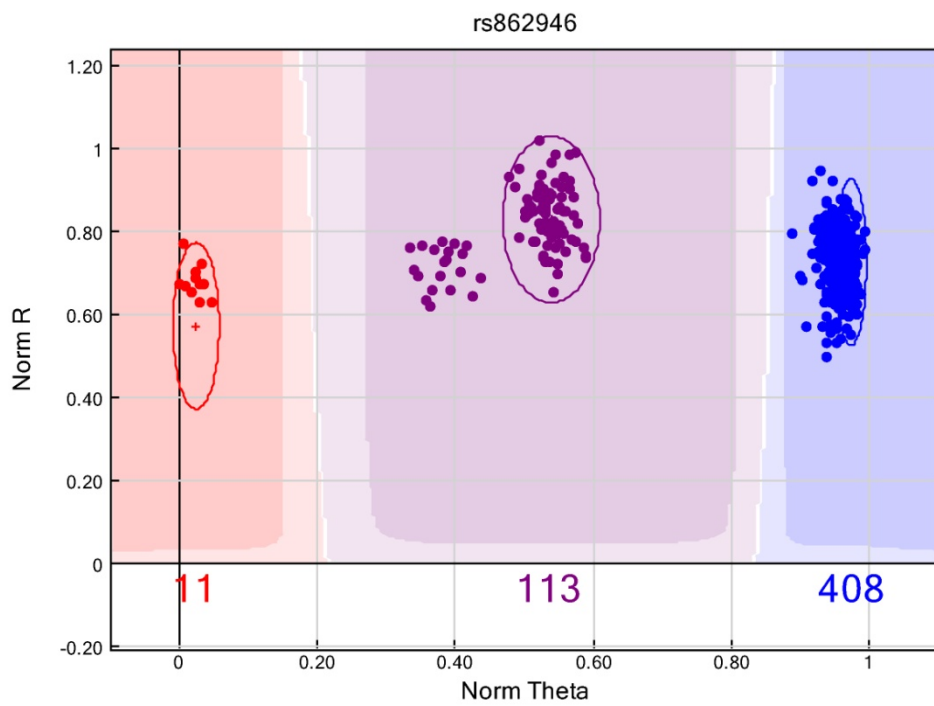

rs76850691

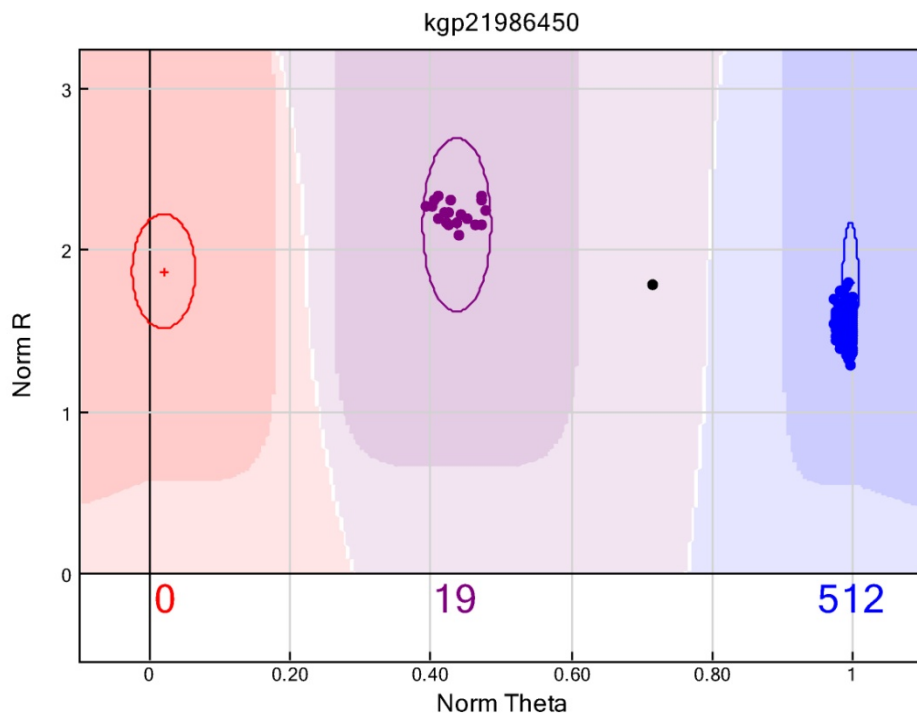

rs892877

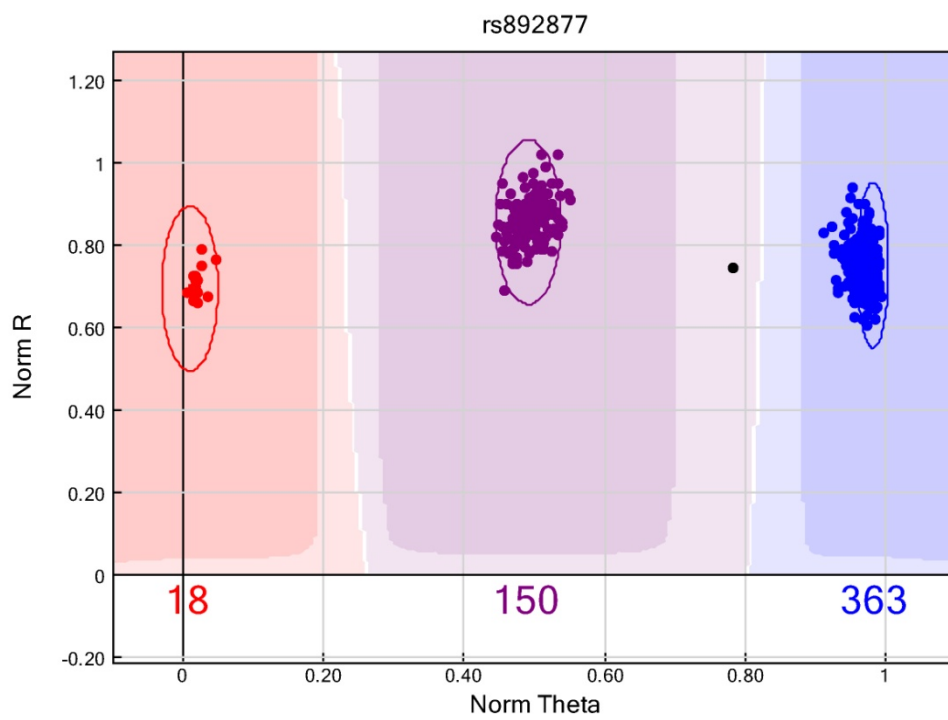

rs457603

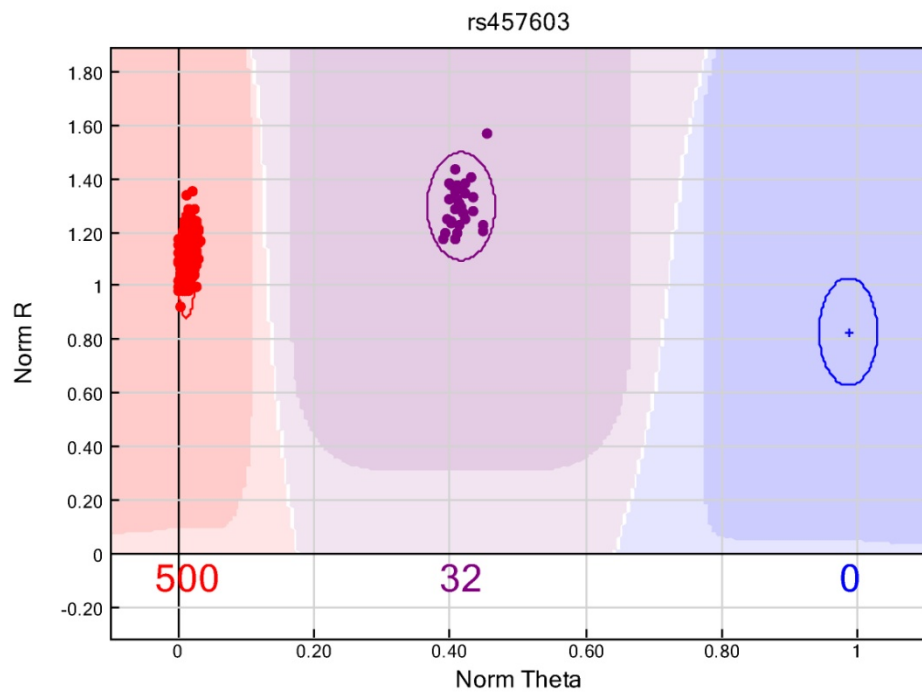

rs452621

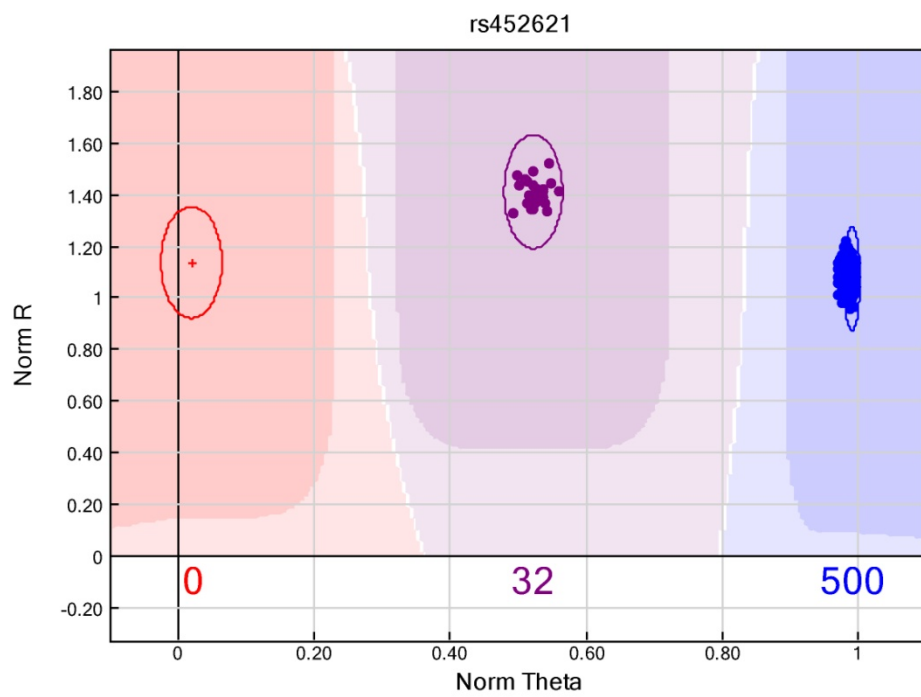

rs984295

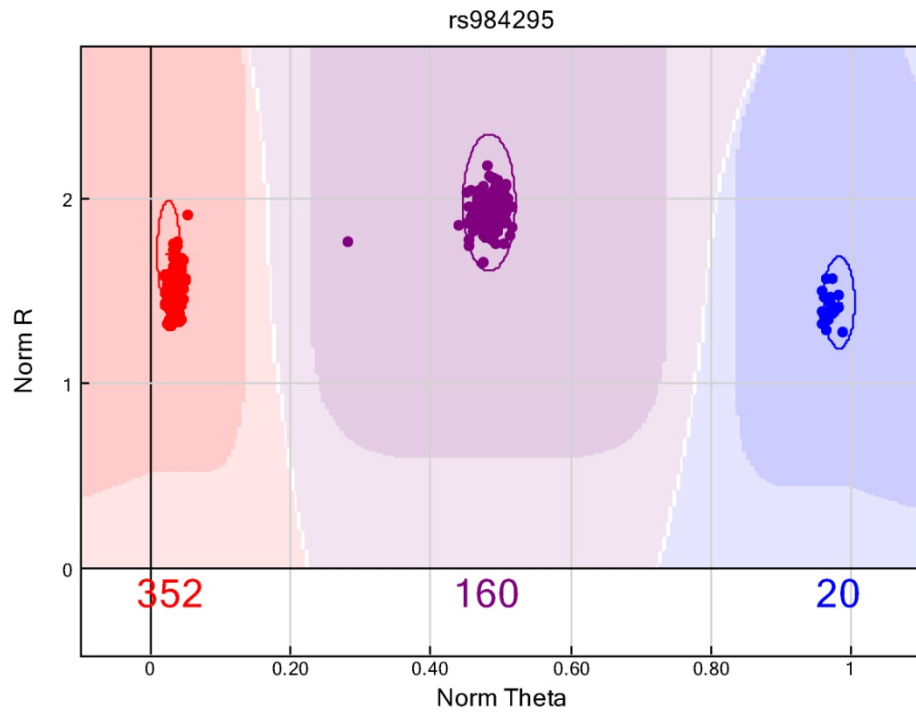

rs7617400

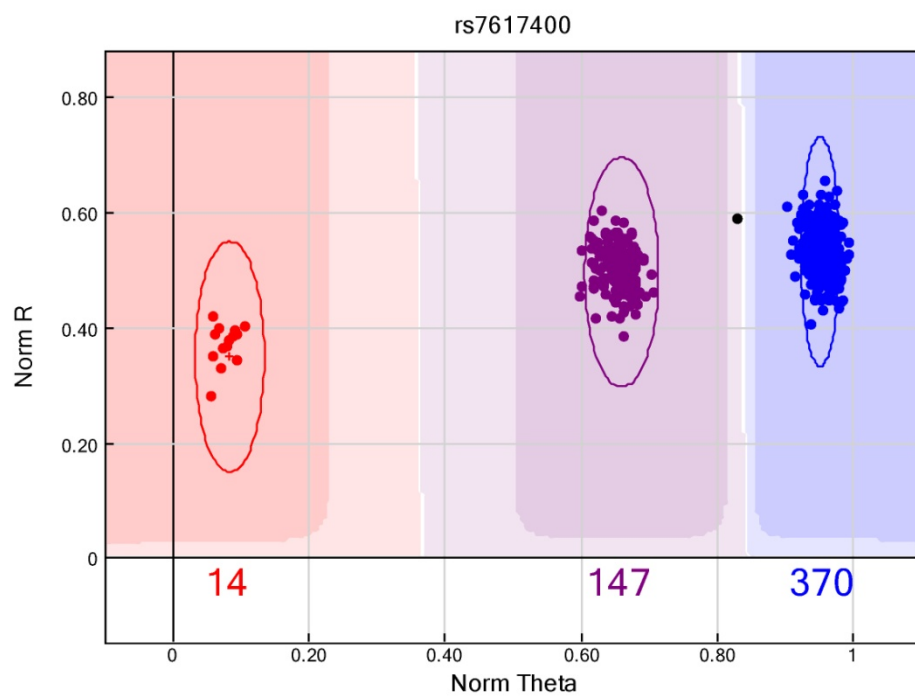

rs11924965

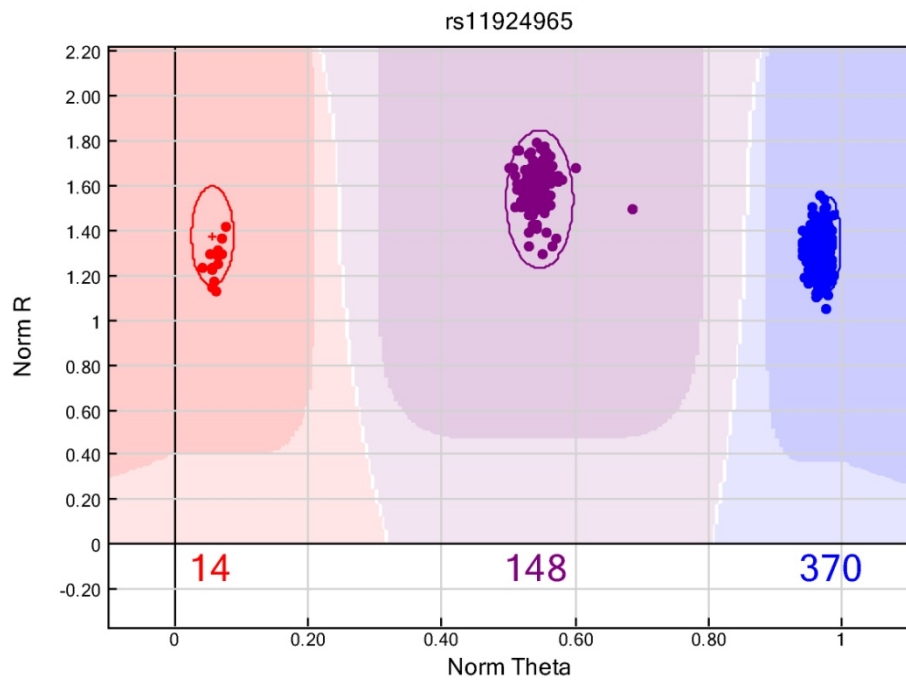

rs7644918

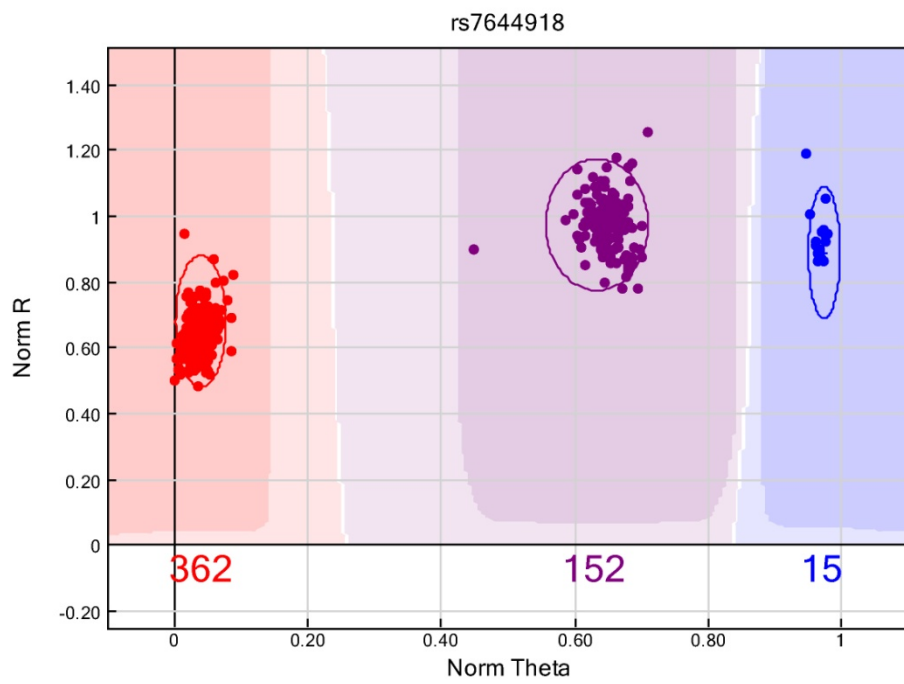

**Supplementary Table 1.** ALT and AST levels according to age and sex of study subjects

|                 | ALT (IU/L)  | AST (IU/L) |
|-----------------|-------------|------------|
| <b>Sex</b>      |             |            |
| Male            | 16.3 ± 12.5 | 24.6 ± 6.1 |
| Female          | 12.9 ± 7.1  | 22 ± 5.3   |
| <b>Age (yr)</b> |             |            |
| 8-9             | 13.1 ± 4.5  | 25.6 ± 4   |
| 9-10            | 14 ± 5.6    | 26.1 ± 5.3 |
| 10-11           | -           | -          |
| 11-12           | 16.3 ± 13.7 | 22.7 ± 6.7 |
| 12-13           | 12.9 ± 7.4  | 20.8 ± 4.2 |

Values are expressed as means ± standard deviations.

ALT, alanine transaminase; AST, aspartate transaminase.

**Supplementary Table 2.** Conditional analysis for multiple association loci

| rs ID      | Chr | Gene<br>(nearest gene) | Position | Affected<br>trait | Adjustment              |                       |           |
|------------|-----|------------------------|----------|-------------------|-------------------------|-----------------------|-----------|
|            |     |                        |          |                   | $P_{\text{unadjusted}}$ | $P_{\text{adjusted}}$ | Covariate |
| rs4949718  | 1   | <i>ST6GALNAC3</i>      | 76672052 | ALT               | 1.87E-07                | 1.31E-02              | AST       |
|            |     |                        |          | AST               | 1.49E-06                | 1.42E-01              | ALT       |
| rs80311637 | 3   | <i>ADAMTS9</i>         | 64511688 | ALT               | 7.18E-06                | 1.44E-01              | AST       |
|            |     |                        |          | AST               | 1.85E-06                | 2.96E-02              | ALT       |
| rs596406   | 10  | <i>CELF2</i>           | 11264671 | ALT               | 9.18E-06                | 2.95E-01              | AST       |
|            |     |                        |          | AST               | 3.69E-07                | 7.05E-03              | ALT       |

ALT, alanine aminotransferase; AST, aspartate aminotransferase.
